# Supplementary material for: An improved dynamic bidirectional coupled hydrologic-hydrodynamic model for efficient flood inundation prediction
Source: Copernicus journal article supplement (doi:10.5194/egusphere-2023-1106), 2023-07-06
Supplement: Supplementary file 1 [file egusphere-2023-1106-supplement.pdf]

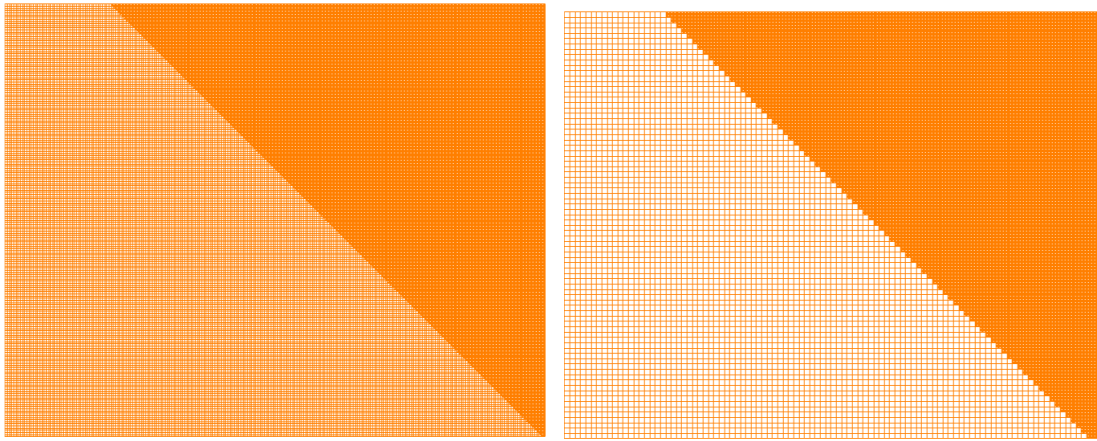

(a)

(b)

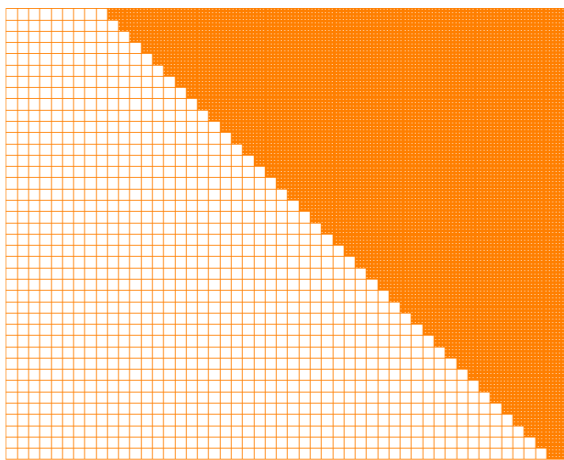

(c)

Figure S1 Grid partition of the cases described in Section 3.1: (a) case12, (b) case15 and (c) case10

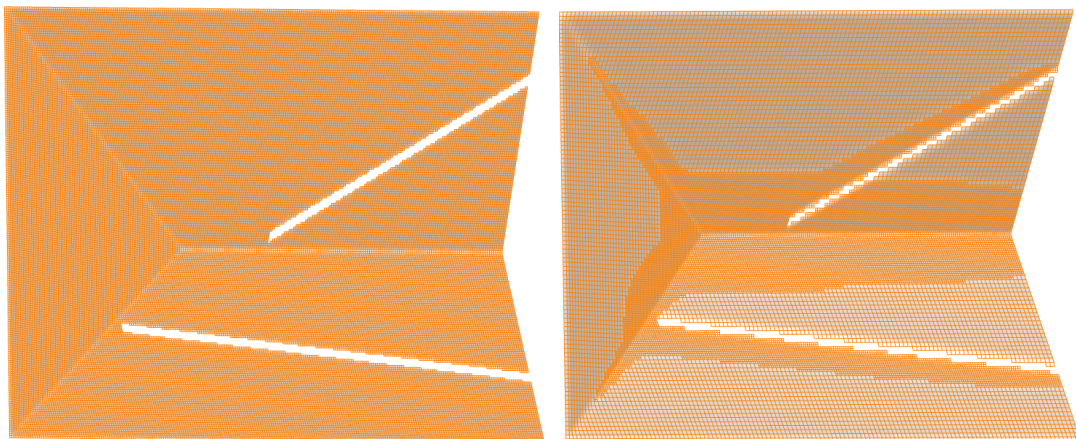

(a)

(b)

Figure S2 Grid partition of the cases described in Section 3.2: (a) uniform grids and  
(b) multi-grids

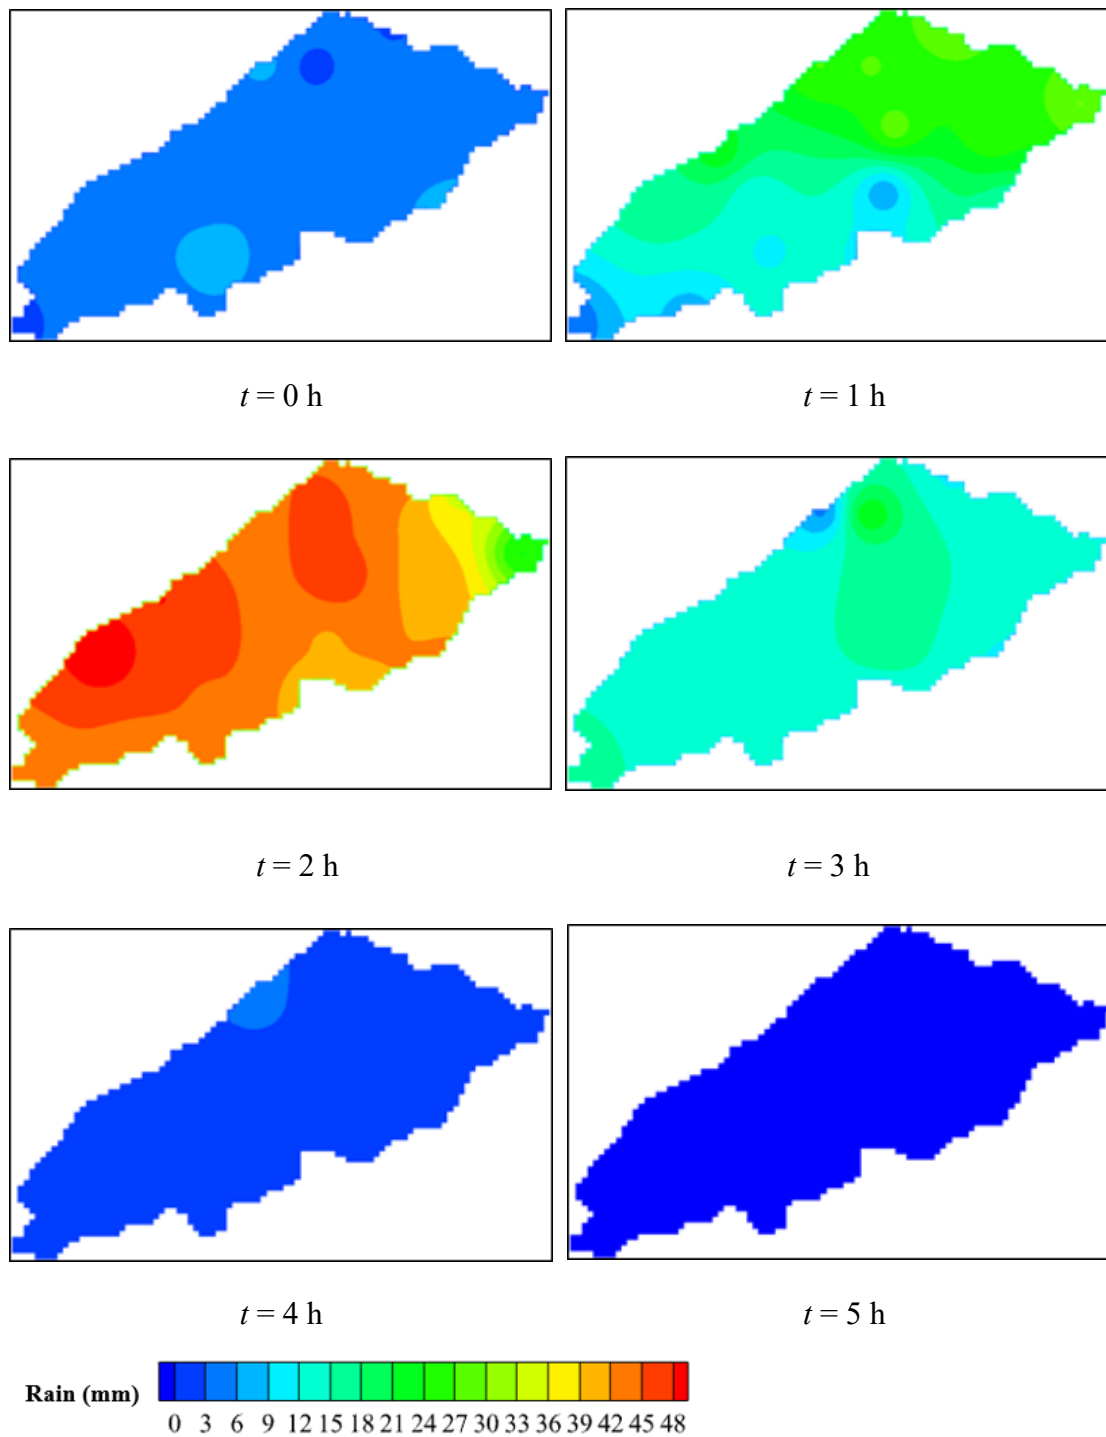

Figure S3 Spatially distribution of rainfall at different times in Section 3.2

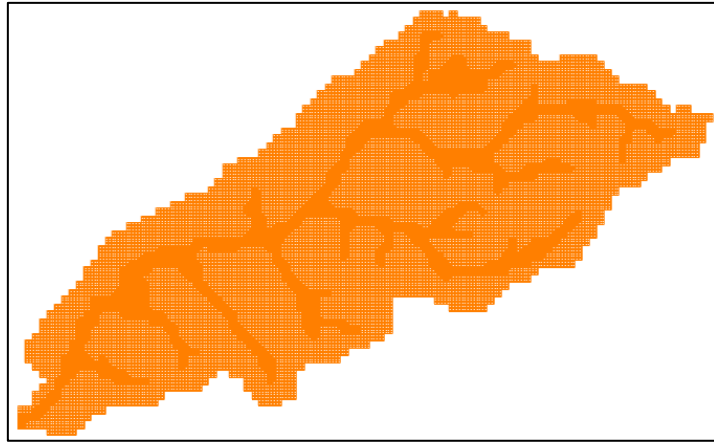

(a)

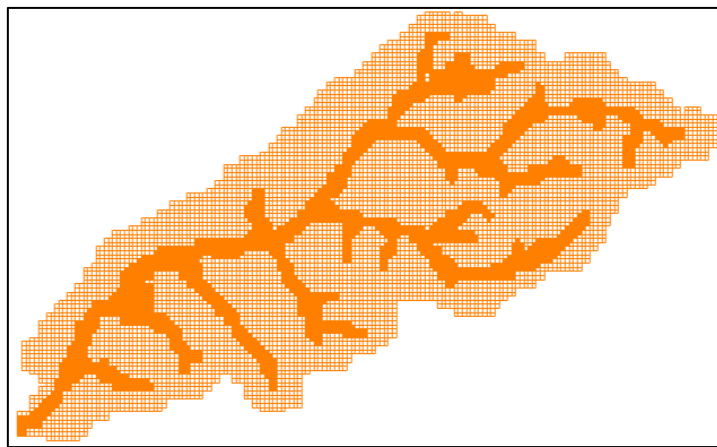

(b)

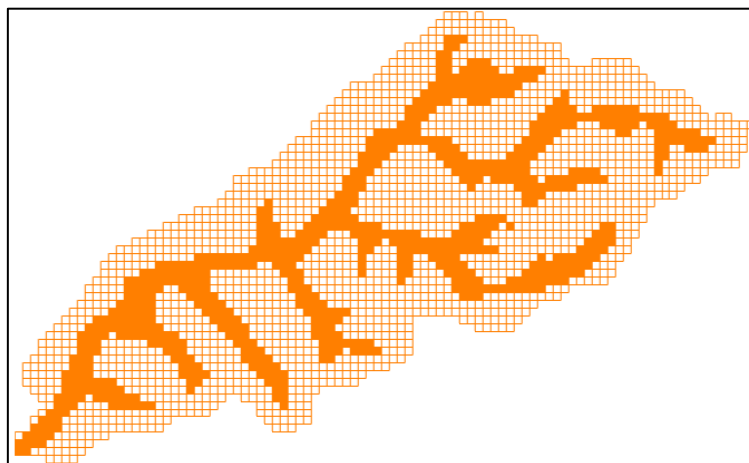

(c)

Figure S4 Grid partition of the Goodwin Basin: (a) case12, (b) case15 and (c) case10

Table S1 Locations of six stations in Goodwin Creek Watershed

| Stations | Longitude and latitude |               | UTM projection |            |
|----------|------------------------|---------------|----------------|------------|
|          | Latitude (N)           | Longitude (W) | X              | Y          |
| P1       | 34.23                  | 89.91         | 231568.71      | 3791553.74 |
| P4       | 34.26                  | 89.87         | 235367.35      | 3794280.52 |
| P6       | 34.27                  | 89.86         | 236459.33      | 3795732.93 |
| P7       | 34.25                  | 89.86         | 236662.95      | 3793699.88 |
| P8       | 34.27                  | 89.84         | 238577.96      | 3795483.81 |
| P14      | 34.25                  | 89.88         | 234644.40      | 3793655.02 |

Table S2 Acronyms and Abbreviations

| Abbreviation | Full name                                                                        |
|--------------|----------------------------------------------------------------------------------|
| IM-DBCM      | Improved Multigrid Dynamical Bidirectional Coupled hydrologic-hydrodynamic Model |
| OM-DBCM      | Original Multigrid Dynamical Bidirectional Coupled hydrologic-hydrodynamic Model |
| DBCM         | Dynamical Bidirectional Coupled hydrologic-hydrodynamic Model                    |
| NLR          | Non-Linear Reservoir                                                             |
| 1D           | One-Dimensional                                                                  |
| 2D           | Two-Dimensional                                                                  |
| SWMM         | Storm Water Management Model                                                     |
| AMR          | Adaptive mesh refinement                                                         |
| CMI          | coupling moving interface                                                        |

---

|       |                                                          |
|-------|----------------------------------------------------------|
| VII   | Variable Interpolation Interface                         |
| SWE   | shallow water equations                                  |
| HLLC  | Harten-Lax-van Leer contact                              |
| MUSCL | Monotone Upstream-centered Schemes for Conservation Laws |
| NSE   | Nash-Sutcliffe efficiency                                |

---
